# Supplementary material for: Tumor cell-specific AIM2 regulates growth and invasion of cutaneous squamous cell carcinoma
Source: PubMed Central journal article supplement (PMC5542230; doi:10.18632/oncotarget.17573), 2017-05-02
Supplement: oncotarget-08-45825-s001.pdf [file oncotarget-08-45825-s001.pdf]

# Tumor cell-specific AIM2 regulates growth and invasion of cutaneous squamous cell carcinoma

## SUPPLEMENTARY MATERIALS

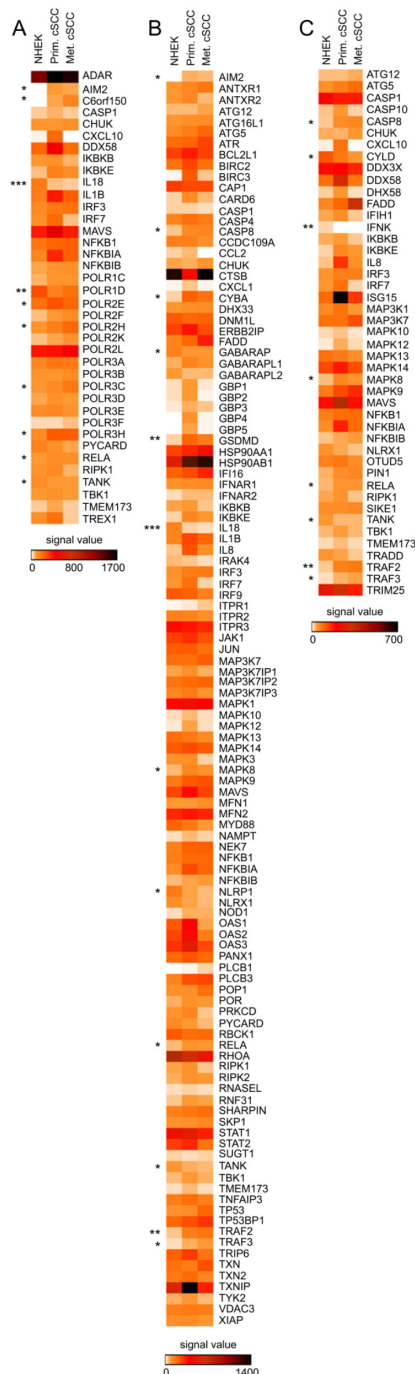

**Supplementary Figure 1: The expression of inflammasome-related genes in NHEKs and cSCC cells.** RNA-seq based analysis of the expression of genes involved in (A) cytosolic DNA-sensing, (B) NOD-like receptor signaling and (C) RIG-I-like receptor signaling KEGG pathways in primary (n=5) and metastatic (n=3) human cSCC cell lines and in NHEKs (n=5). \* $P < 0.05$ , \*\* $P < 0.01$ , \*\*\* $P < 0.001$ ; Student's *t*-test.

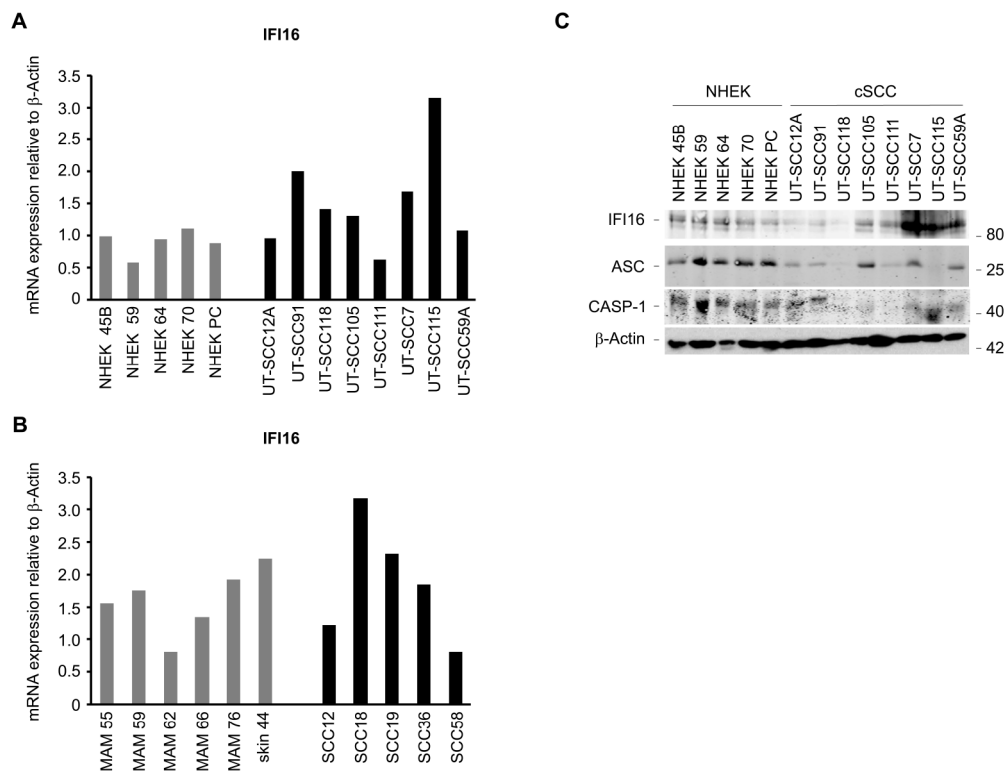

**Supplementary Figure 2: Expression of IFI16, ASC and CASP1 in cSCC cells.** (A) *IFI16* mRNA levels in cSCC cell lines (n=8) and NHEKs (n=5) were determined with qRT-PCR. (B) *IFI16* mRNA levels in cSCC tumors (n=6) and normal human skin (n=6) *in vivo* were analyzed by qRT-PCR. (C) IFI16, ASC and CASP1 protein levels in cell lysates of NHEKs and cSCC cells were determined by Western blotting with  $\beta$ -Actin as a loading control.

**cSCC**

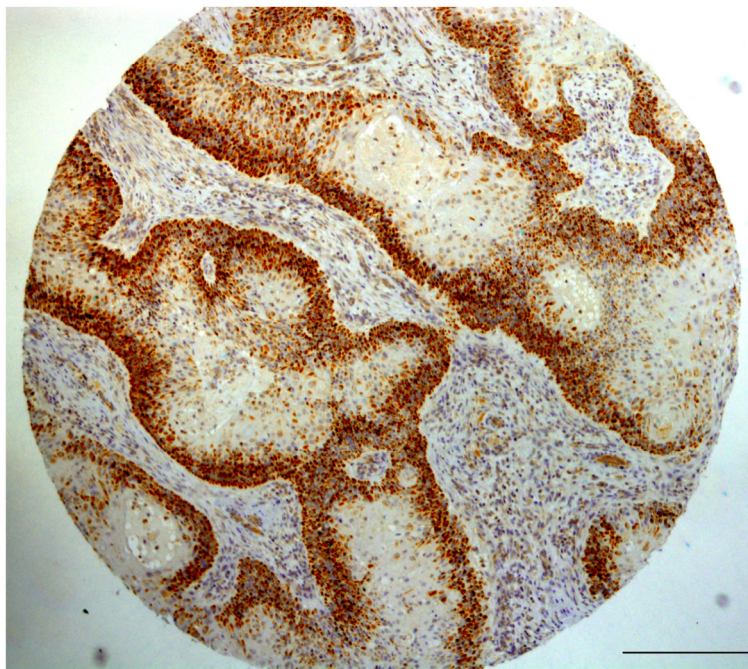

**Supplementary Figure 3: Expression of AIM2 by tumor cells in cutaneous squamous cell carcinoma (cSCC).** A TMA tissue section of cSCC was stained by IHC with anti-AIM2 antibody. AIM2 expression was detected in tumors cells at the invasive edges of the cSCC. Scale bar=500  $\mu$ m.

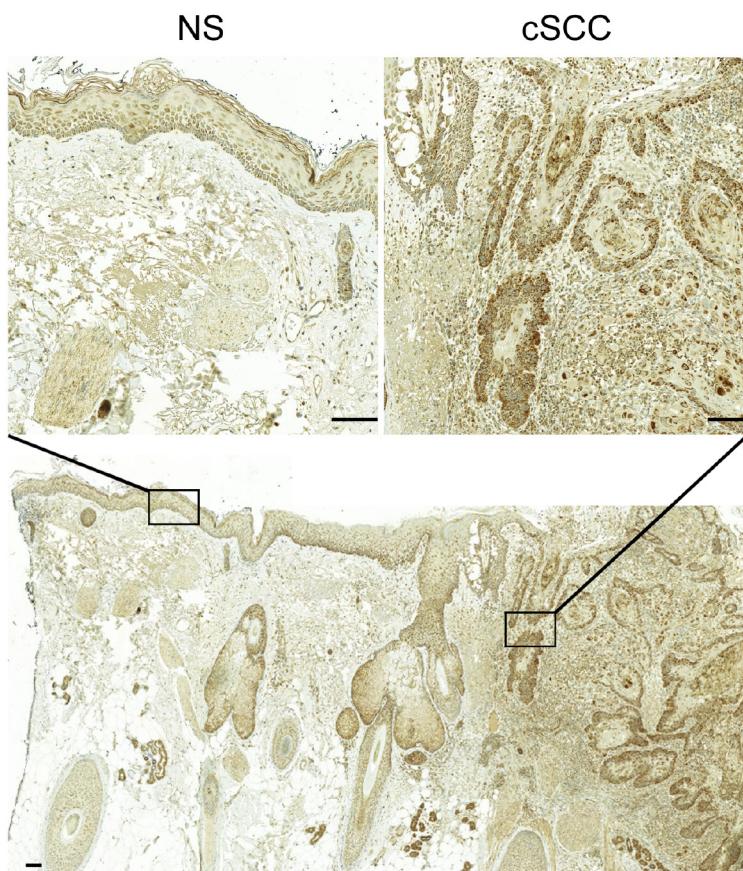

**Supplementary Figure 4: Expression of AIM2 by tumor cells in cutaneous squamous cell carcinoma (cSCC).** A whole tissue section of cSCC containing adjacent normal skin (NS) was stained by IHC with anti-AIM2 antibody. Specific expression of AIM2 was detected in tumor cells in cSCC. In the adjacent normal skin, expression of AIM2 was weak. Scale bar=100 μm.

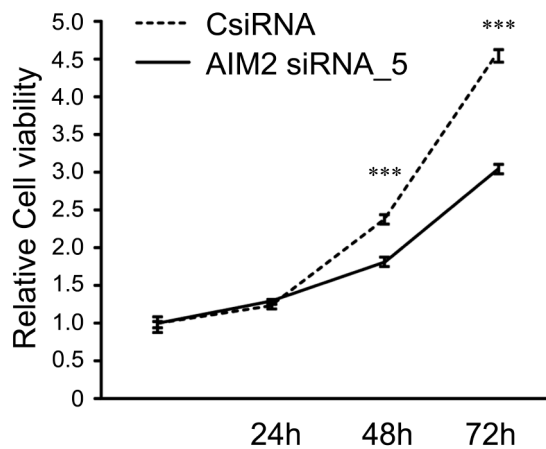

**Supplementary Figure 5: Knockdown of AIM2 results in reduction in cSCC cell viability.** The number of viable cSCC cells (UT-SCC7) was determined 24, 48, and 72 hours after transfection with AIM2 siRNA\_5 and control siRNA (CsiRNA) (mean±SD, n=8). \*\*\* $P < 0.001$ ; Student's *t*-test.

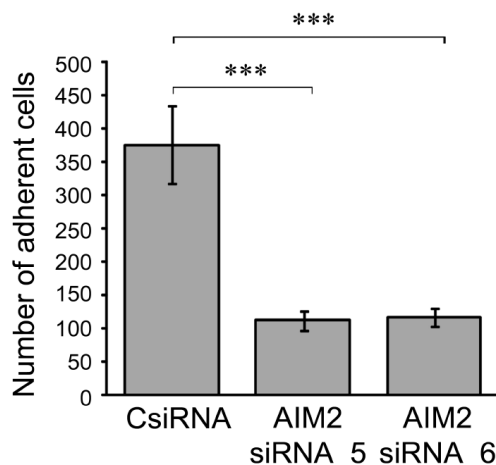

**Supplementary Figure 6: Knockdown of AIM2 results in reduction in the number of cSCC cells.** The number of cSCC cells (UT-SCC7) was counted 72 hours after transfection with AIM2 siRNA\_5, AIM2 siRNA\_6 and control siRNA (CsiRNA) (mean±SD, n=8). \*\*\* $P < 0.001$ ; Student's *t*-test.

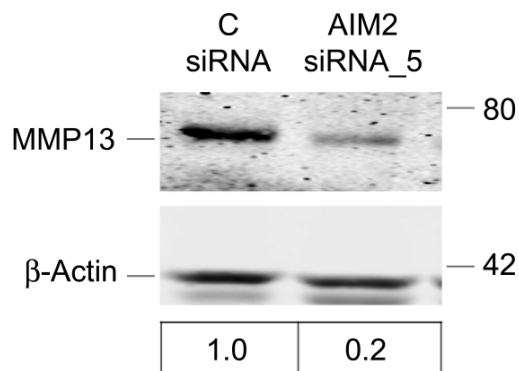

**Supplementary Figure 7: Knockdown of AIM2 inhibits production of MMP13 in cSCC cells.** Levels of MMP13 in conditioned media of cSCC cells were determined by Western blot analysis 72 hours after AIM2 knockdown with AIM2 siRNA\_5. β-Actin in cell lysates was determined as a marker for equal loading. Levels of MMP13 were quantitated by densitometry and corrected for the level of β-actin. The values are shown relative to the level in culture transfected with control siRNA (C\_siRNA).



**Supplementary Table 1: Summary of networks associated with the differentially expressed molecules after AIM2 knockdown.**

| Top networks                                                                                                    | Score <sup>a</sup> |
|-----------------------------------------------------------------------------------------------------------------|--------------------|
| Humoral Immune Response, Protein Synthesis, Cellular Growth and Proliferation                                   | 39                 |
| Embryonic Development, Tissue Morphology, Cell Cycle                                                            | 34                 |
| Cellular Assembly and Organization, Connective Tissue Disorders, Developmental Disorder                         | 32                 |
| Cell Death and Survival, Cellular Development, Organismal Development                                           | 32                 |
| Cancer, Endocrine System Disorders, Hematological Disease                                                       | 30                 |
| Cardiovascular System Development and Function, Organismal Development, Tissue Morphology                       | 26                 |
| Cellular Development, Cellular Growth and Proliferation, Embryonic Development                                  | 24                 |
| Cardiovascular System Development and Function, Organismal Development, Tissue Morphology                       | 24                 |
| Cell Cycle, Cellular Assembly and Organization, DNA Replication, Recombination, and Repair                      | 24                 |
| Nervous System Development and Function, Tissue Morphology, Cancer                                              | 23                 |
| Skeletal and Muscular System Development and Function, Cellular Assembly and Organization, Cellular Development | 23                 |
| Cardiac Arrhythmia, Cardiovascular Disease, Developmental Disorder                                              | 22                 |
| Post-Translational Modification, Cardiovascular Disease, Cell-To-Cell Signaling and Interaction                 | 21                 |
| Embryonic Development, Immunological Disease, Inflammatory Disease                                              | 21                 |
| Cancer, Organismal Injury and Abnormalities, Respiratory Disease                                                | 21                 |
| Dermatological Diseases and Conditions, Developmental Disorder, Hereditary Disorder                             | 19                 |
| Molecular Transport, Cellular Growth and Proliferation, Renal and Urological System Development and Function    | 19                 |
| Cellular Function and Maintenance, Small Molecule Biochemistry, Molecular Transport                             | 19                 |
| Hereditary Disorder, Metabolic Disease, Developmental Disorder                                                  | 19                 |
| Connective Tissue Disorders, Infectious Disease, Metabolic Disease                                              | 19                 |
| Nervous System Development and Function, Inflammatory Disease, Inflammatory Response                            | 19                 |
| Cell Death and Survival, Cell Cycle, Cellular Movement                                                          | 19                 |
| Cellular Compromise, Organismal Injury and Abnormalities, Skeletal and Muscular Disorders                       | 18                 |
| Cell-To-Cell Signaling and Interaction, Cellular Movement, Hematological System Development and Function        | 17                 |
| Developmental Disorder, Hematological Disease, Hereditary Disorder                                              | 17                 |

Cutaneous SCC cell lines (UT-SCC7, UT-SCC12A, and UT-SCC105) were transfected with AIM2 siRNA<sub>6</sub> or control siRNA (75 nM). 72 hours after transfection, whole transcriptome analysis was performed with RNA-seq. Summary of networks related to AIM2 knockdown identified by Ingenuity Pathway analysis (IPA) are shown ( $P < 0.05$ , FC log<sub>2</sub> > 0.75)

<sup>a</sup>Derived from a  $P$  value indicating the likelihood that genes in a network are associated randomly
